# Supplementary material for: Epstein-Barr virus nuclear protein EBNA3C directly induces expression of AID and somatic mutations in B cells
Source: PubMed Central journal article supplement — J Exp Med. 2016 May 30;213(6):921–8. doi: 10.1084/jem.20160120 (PMC4886369; doi:10.1084/jem.20160120), 2016-05-30
Supplement: supp_jem.20160120_JEM_20160120_sm.pdf [file supp_jem.20160120_JEM_20160120_sm.pdf]

## SUPPLEMENTAL MATERIAL

Kalchschmidt et al., <http://www.jem.org/cgi/content/full/jem.20160120/DC1>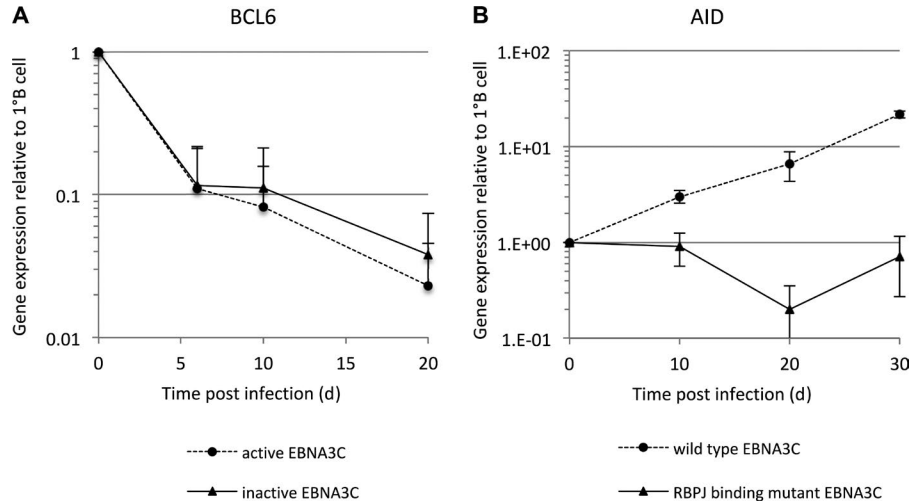

Figure S1. **Repression of *BCL6* is independent of EBNA3C, and induction of *AID* is dependent on the ability of EBNA3C to interact with RBPJ.** (A) Infection of primary B cells with recombinant EBV expressing active (3CRev or 3CHT +HT) or inactive (3CKO or 3CHT –HT) EBNA3C. Gene expression of *BCL6* was normalized to *GAPDH* or *GNB2L1* and is shown relative to uninfected primary B cells. (B) Infection of primary B cells with recombinant EBV with wild-type EBNA3C or encoding an EBNA3C mutant that is unable to bind to RBPJ (RBPJ-binding mutant EBNA3C). *AID* mRNA expression was normalized to *GNB2L1* and is shown relative to uninfected primary B cell. Results show mean  $\pm$  SD of two biological replicates using B cells from different donors.

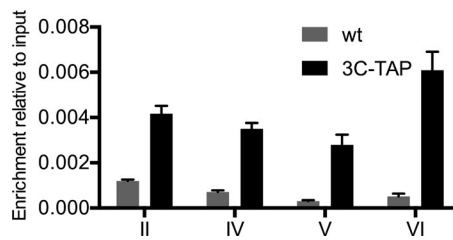

Figure S2. **ChIP-qPCR verification of EBNA3C occupancy at regulatory regions of *AICDA*.** Anti-Flag ChIP was performed on LCLs with either EBNA3C-TAP or untagged (wt) EBNA3C and determined by qPCR at the indicated regulatory regions of *AICDA*. ChIP values represent enrichment relative to input  $\pm$  SD of triplicate qPCR reactions for ChIP and input of each sample. These are representative results of two biological replicates.

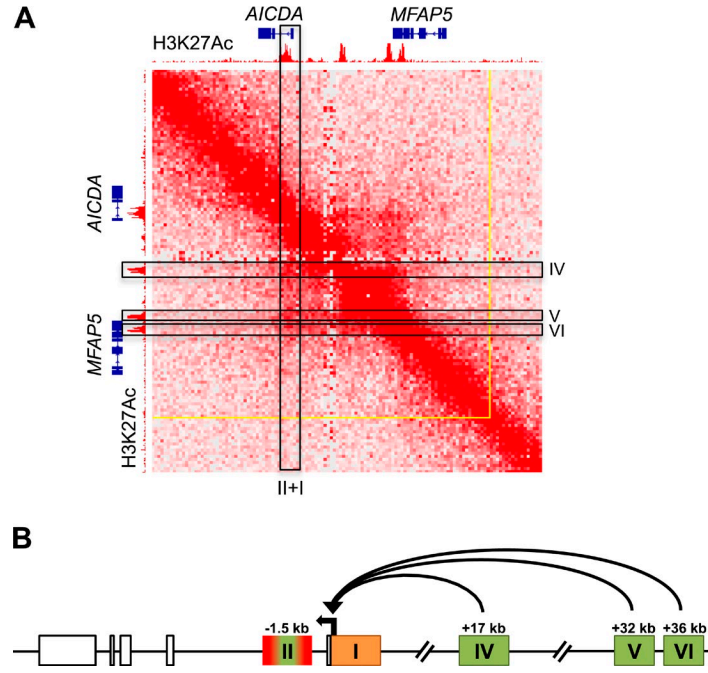

Figure S3. **Higher order chromatin structure of the *AICDA* locus in LCL GM12878.** (A) Juicebox was used to display GM12878 in situ Mbol combined (4.9 B) Hi-C map at 1-kb resolution (Rao et al., 2014). The intensity of each pixel represents the normalized (balanced) observed number of contacts between a pair of loci. Gene location for *AICDA* and *MFAP5*, H3K27ac in LCL GM12878, topologically associating domain (yellow box), and locations of AID regulatory regions are indicated. (B) Schematic overview of higher order chromatin structure of the *AICDA* locus in LCL GM12878 with chromatin looping indicated by black arrows between the promoter region of *AICDA* and upstream enhancer elements IV, V, and VI.

Table S1. **Total number of sequencing reads and unique V-D-J rearrangements per sample**

| Condition | Day | Technical replicate | Number of reads | Number of unique V-D-J rearrangements |       |
|-----------|-----|---------------------|-----------------|---------------------------------------|-------|
| -HT       | 0   | A                   | 198,362         | 11,219                                |       |
|           |     | B                   | 194,823         | 6,186                                 |       |
|           |     | C                   | 149,604         | 8,850                                 |       |
|           |     | D                   | 147,598         | 8,878                                 |       |
|           | 15  | A                   | 201,034         | 9,582                                 |       |
|           |     | A                   | 137,139         | 6,154                                 |       |
|           | 30  | B                   | 184,503         | 3,756                                 |       |
|           |     | A                   | 150,120         | 5,676                                 |       |
|           | 60  | B                   | 164,873         | 3,156                                 |       |
|           |     | A                   | 179,405         | 9,541                                 |       |
|           | +HT | 15                  | A               | 194,136                               | 8,621 |
|           |     |                     | B               | 191,113                               | 3,613 |
| 30        |     | A                   | 221,088         | 7,424                                 |       |
|           |     | B                   | 187,481         | 3,559                                 |       |
| 60        |     | A                   | 204,514         | 7,022                                 |       |
|           |     | B                   |                 |                                       |       |

Table S2. Characteristics of the four major clones according to the IMGT database

| Clone color | V gene       | J gene   | Nucleotide identity |          | Percentage of culture |      |      |      |      |
|-------------|--------------|----------|---------------------|----------|-----------------------|------|------|------|------|
|             |              |          | V-region            | J-region | -HT                   |      |      | +HT  |      |
|             |              |          |                     |          | d0                    | d30  | d60  | d30  | d60  |
| Blue        | IGHV3-23*01  | IGHJ4*02 | 205/222             | 25/30    | 29.8                  | 53.4 | 45.4 | 45.3 | 33.7 |
| Red         | IGHV3-7*01   | IGHJ4*02 | 200/219             | 31/31    | 31.3                  | 39.6 | 54.5 | 39.7 | 65.9 |
| Green       | IGHV6-1*02   | IGHJ4*02 | 228/228             | 27/31    | 15.2                  | 2.5  | 0.01 | 9.3  | 0.03 |
| Orange      | IGHV7-4-1*02 | IGHJ6*03 | 213/219             | 41/45    | 16.4                  | 4.0  | 0.01 | 5.2  | 0.18 |

Table S3. Sequences of RT-qPCR primers

| Gene          | Primer sequence (5'-3')                                        | Reference           |
|---------------|----------------------------------------------------------------|---------------------|
| <i>AICDA</i>  | Forward: AGCCGTTCTTATTGCGAAGA<br>Reverse: TGATGAACCGGAGGAAGTTT |                     |
| <i>BCL6</i>   | Forward: CTGCAGATGGAGCATGTTGT<br>Reverse: TCTTCACGAGGAGGCTTGAT | Tran et al. (2010)  |
| <i>GNB2L1</i> | Forward: GCTTGCAGTTAGCCAGGTTT<br>Reverse: GAGTGTGGCCTTCTCCTCTG | Zhang et al. (2005) |
| <i>GAPDH</i>  | Hs_GAPDH_2_SG QuantiTect primer assay, cat. no. QT01192646     | QIAGEN              |

Table S4. Sequences of ChIP primers

| Primer name  | Primer sequence (5'-3')                                             | Reference              |
|--------------|---------------------------------------------------------------------|------------------------|
| Region I     | Forward: GAGGAAGGCCAGTGCAATCA<br>Reverse: CAGGGAGGCAAGAAGACACT      |                        |
| Region II    | Forward: GCTAGTTAACTTTGTTGATC<br>Reverse: CTAAGCAGGACAGAAATGAC      |                        |
| Region IV    | Forward: TGGACACCAGCTAGATTGTTCA<br>Reverse: TCACACTTTCACCCACACAGA   |                        |
| Region V     | Forward: CCTGTTCTCTCCTTACCGC<br>Reverse: ACGGAAGCCCTTGTATCTTTGA     |                        |
| Region VI    | Forward: CAGCAAGTTTCTTCTGCGA<br>Reverse: GCCATTTCTGACTCAGCAGC       |                        |
| Control      | Forward: GTCCTGTACAGTAACTAGAGAAAA<br>Reverse: GCAAAGCAAGACGACAAAGGA |                        |
| <i>GAPDH</i> | Forward: CGCTCTCTGCTCCTCC<br>Reverse: TTTCTCTCCGCCCTCCAC            | EMD Millipore          |
| Myoglobin    | Forward: GGAGAAAGAAGGGGAATCACA<br>Reverse: GATAAATATAGCCAACGCCACA   | Delbarre et al. (2010) |

## REFERENCES

- Delbarre, E., B.M. Jacobsen, A.H. Reiner, A.L. Sorensen, T. Küntziger, and P. Collas. 2010. Chromatin environment of histone variant H3.3 revealed by quantitative imaging and genome-scale chromatin and DNA immunoprecipitation. *Mol. Biol. Cell.* 21:1872–1884. <http://dx.doi.org/10.1091/mbc.E09-09-0839>
- Tran, T.H., F.E. Utama, J. Lin, N. Yang, A.B. Sjolund, A. Ryder, K.J. Johnson, L.M. Neilson, C. Liu, K.L. Brill, et al. 2010. Prolactin inhibits BCL6 expression in breast cancer through a Stat5a-dependent mechanism. *Cancer Res.* 70:1711–1721. <http://dx.doi.org/10.1158/0008-5472.CAN-09-2314>
- Zhang, X., L. Ding, and A.J. Sandford. 2005. Selection of reference genes for gene expression studies in human neutrophils by real-time PCR. *BMC Mol. Biol.* 6:4. <http://dx.doi.org/10.1186/1471-2199-6-4>
